# Supplementary material for: The intricate cellular ecosystem of human peripheral veins as revealed by single-cell transcriptomic analysis
Source: PubMed Central journal article supplement (PMC10783777; doi:10.1371/journal.pone.0296264), 2024-01-11
Supplement: pone.0296264.s001.pdf [file pone.0296264.s001.pdf]

**S1 Table. Demographic characteristics of the single-cell RNA sequencing and histological validation cohorts**

| Sample ID                                | Age | Sex | Race/Ethnicity | Blood Vessel | # Cells After QC* |
|------------------------------------------|-----|-----|----------------|--------------|-------------------|
| <b>Single-Cell RNA Sequencing Cohort</b> |     |     |                |              |                   |
| CV1                                      | 26  | F   | Black          | Cephalic V.  | 4,663             |
| BV1                                      | 70  | M   | White          | Basilic V.   | 3,473             |
| BV2                                      | 38  | F   | Hispanic       | Basilic V.   | 10,819            |
| BV3                                      | 64  | M   | White          | Basilic V.   | 1,051             |
| <b>Histological Validation Cohort</b>    |     |     |                |              |                   |
| CV2                                      | 56  | M   | Hispanic       | Cephalic V.  | NA                |
| CV3                                      | 55  | M   | Hispanic       | Cephalic V.  | NA                |
| BV4                                      | 65  | M   | White          | Basilic V.   | NA                |
| BV5                                      | 30  | M   | White          | Basilic V.   | NA                |
| BV6                                      | 56  | M   | Hispanic       | Basilic V.   | NA                |
| BV7                                      | 45  | F   | White          | Basilic V.   | NA                |
| BV8                                      | 24  | F   | White          | Basilic V.   | NA                |
| BV9                                      | 52  | M   | White          | Basilic V.   | NA                |
| BV10                                     | 21  | M   | White          | Basilic V.   | NA                |
| BV11                                     | 41  | M   | White          | Basilic V.   | NA                |
| BV12                                     | 29  | M   | Hispanic       | Basilic V.   | NA                |
| BA1                                      | 56  | M   | White          | Brachial A.  | NA                |

*\*Number of cells included in bioinformatic analyses after quality control (QC) filters*

*Abbreviations: V, vein; A, artery; NA, not applicable*
