# Supplementary material for: The intricate cellular ecosystem of human peripheral veins as revealed by single-cell transcriptomic analysis
Source: PubMed Central journal article supplement (PMC10783777; doi:10.1371/journal.pone.0296264), 2024-01-11
Supplement: pone.0296264.s002.pdf [file pone.0296264.s002.pdf]

**A**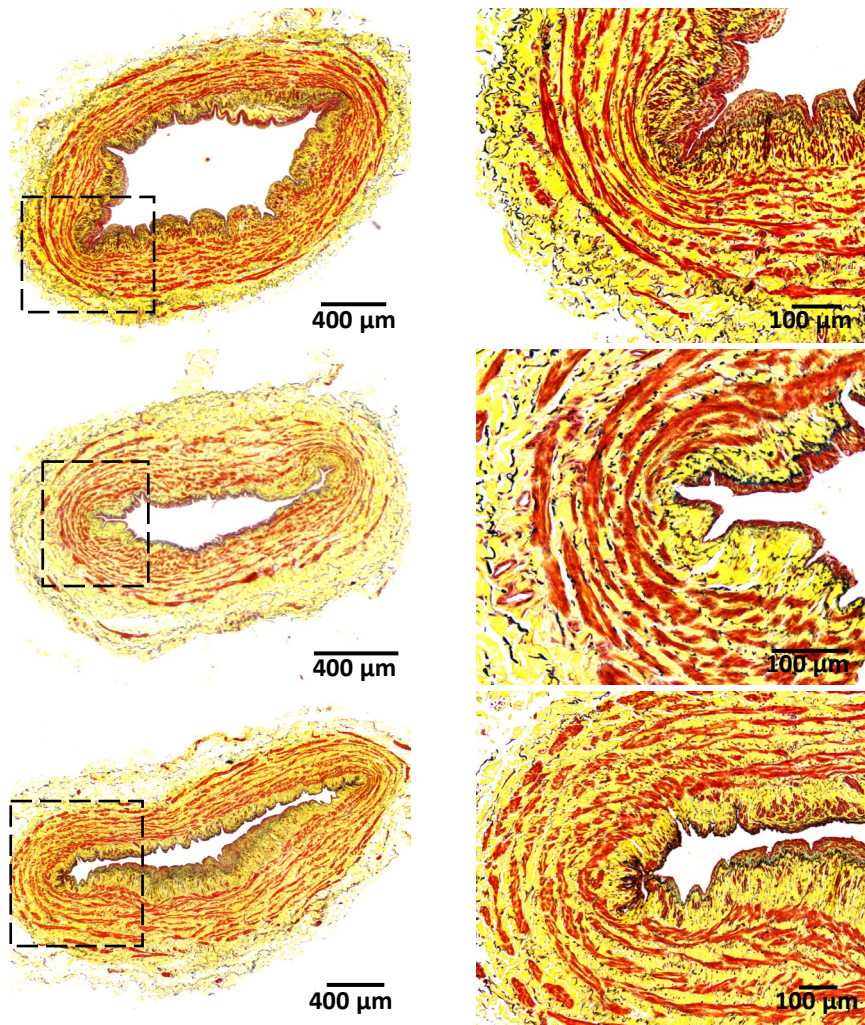**B**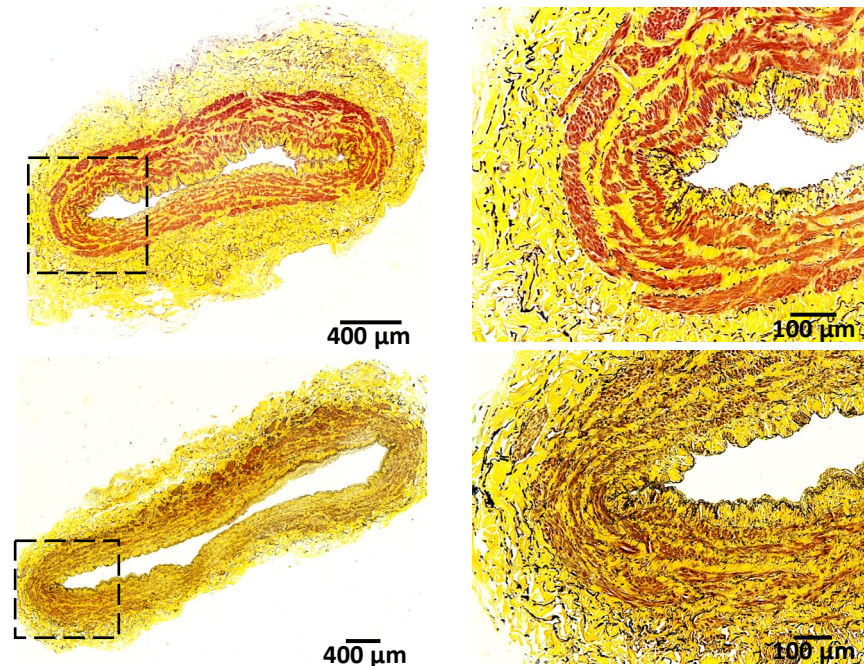**C**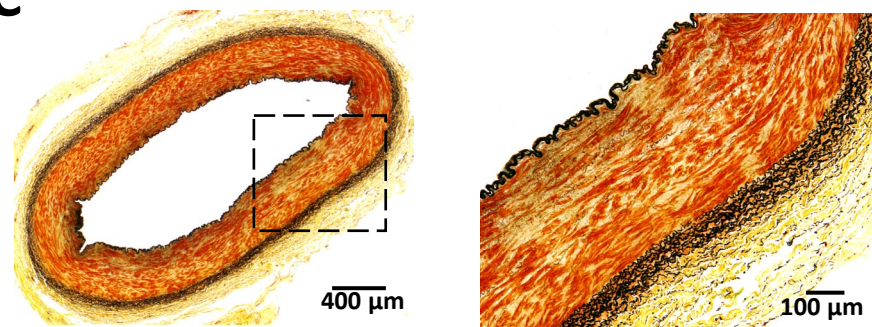

**S1 Fig. Histology of upper arm vessels.** Representative Movat pentachrome stained sections of vascular tissues used for validation studies. Images include three basilic veins (A), two cephalic veins (B), and a brachial artery as reference (C). Dashed boxes are magnified to the right.
