# Supplementary material for: The intricate cellular ecosystem of human peripheral veins as revealed by single-cell transcriptomic analysis
Source: PubMed Central journal article supplement (PMC10783777; doi:10.1371/journal.pone.0296264), 2024-01-11
Supplement: pone.0296264.s003.pdf [file pone.0296264.s003.pdf]

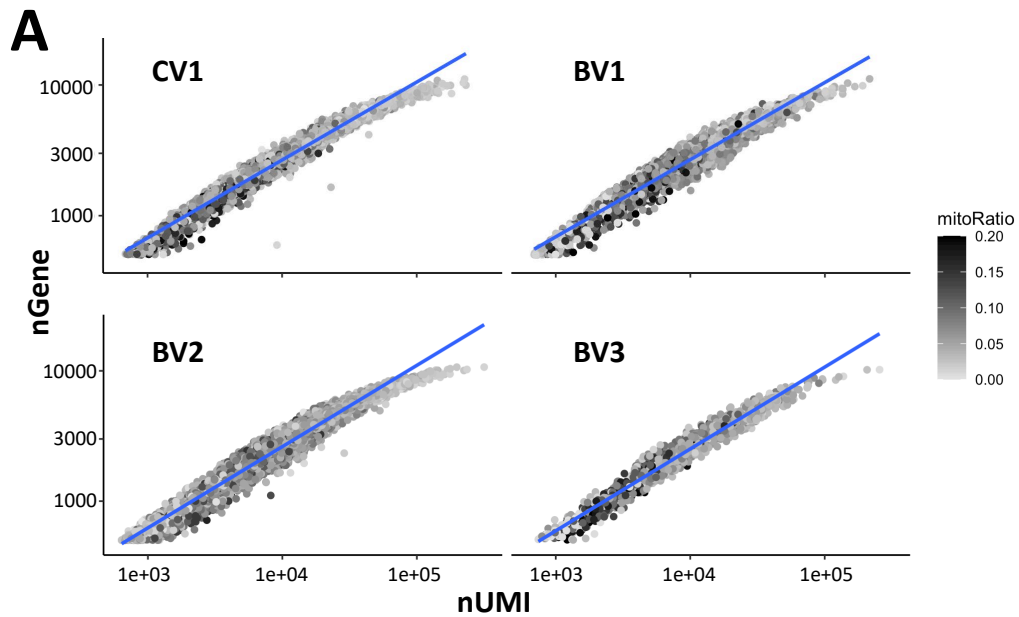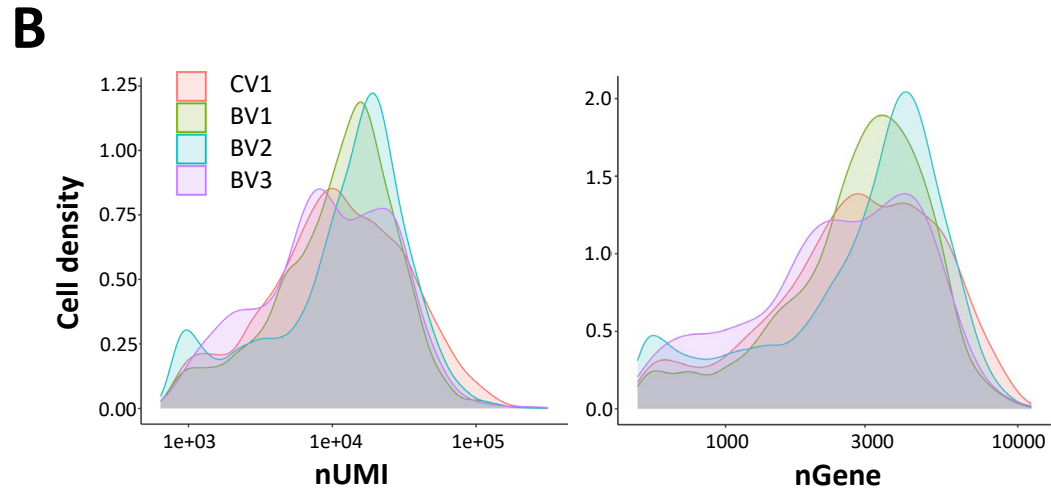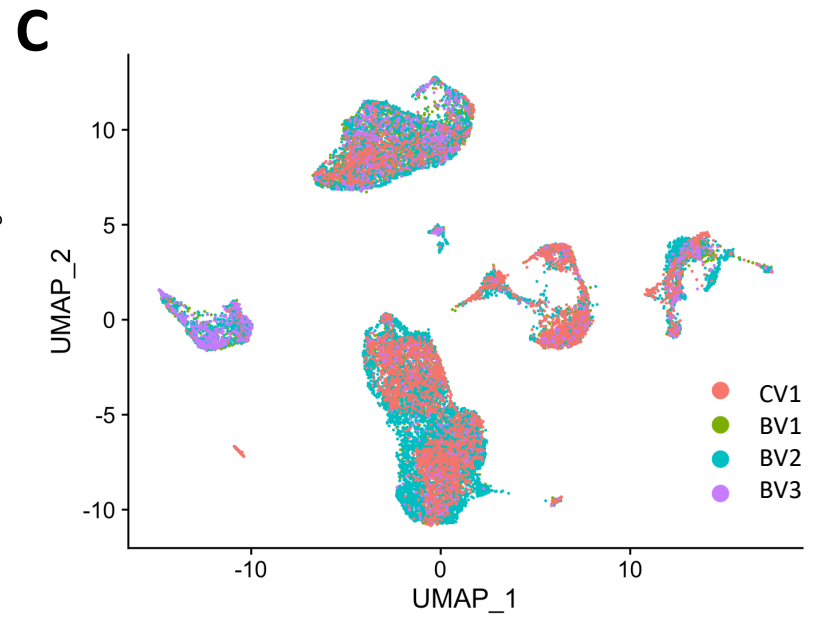

**S2 Fig. Quality control (QC) metrics of single-cell RNA libraries. A)** Number of genes versus number of UMIs (transcripts) per cell after initial QC filters with color legend indicating mitochondrial read fractions (mitoRatio). **B)** Cell density histograms indicating distribution of UMI counts and gene counts per cell in the four vein samples. Cells with <200 genes, >0.15 mitoRatio, or predicted as doublets were filtered out from downstream bioinformatic analyses. **C)** UMAP plot color coded by sample demonstrating cell integration of individual single cell libraries.
