# Supplementary material for: The intricate cellular ecosystem of human peripheral veins as revealed by single-cell transcriptomic analysis
Source: PubMed Central journal article supplement (PMC10783777; doi:10.1371/journal.pone.0296264), 2024-01-11
Supplement: pone.0296264.s006.pdf [file pone.0296264.s006.pdf]

**A**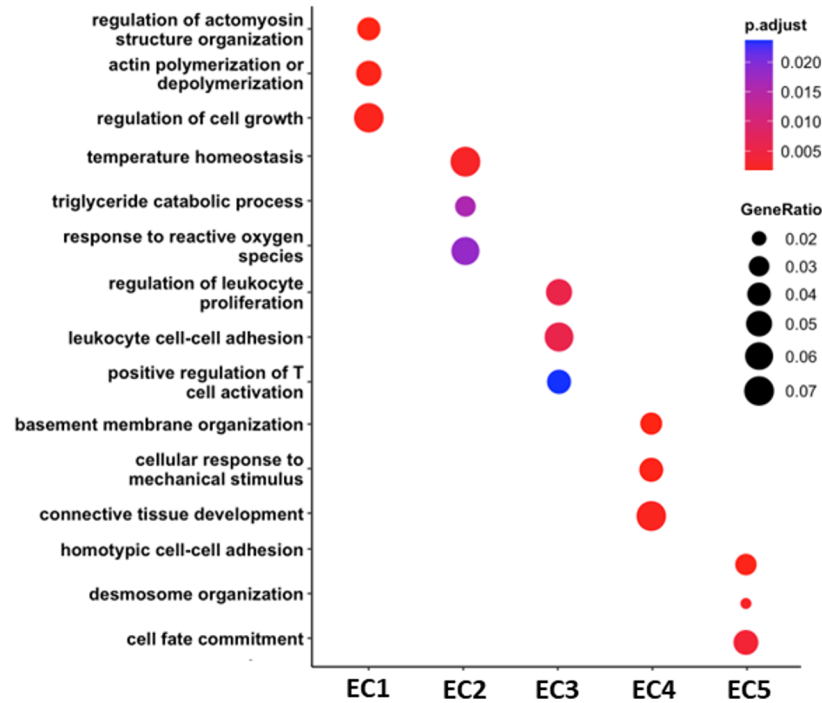**B**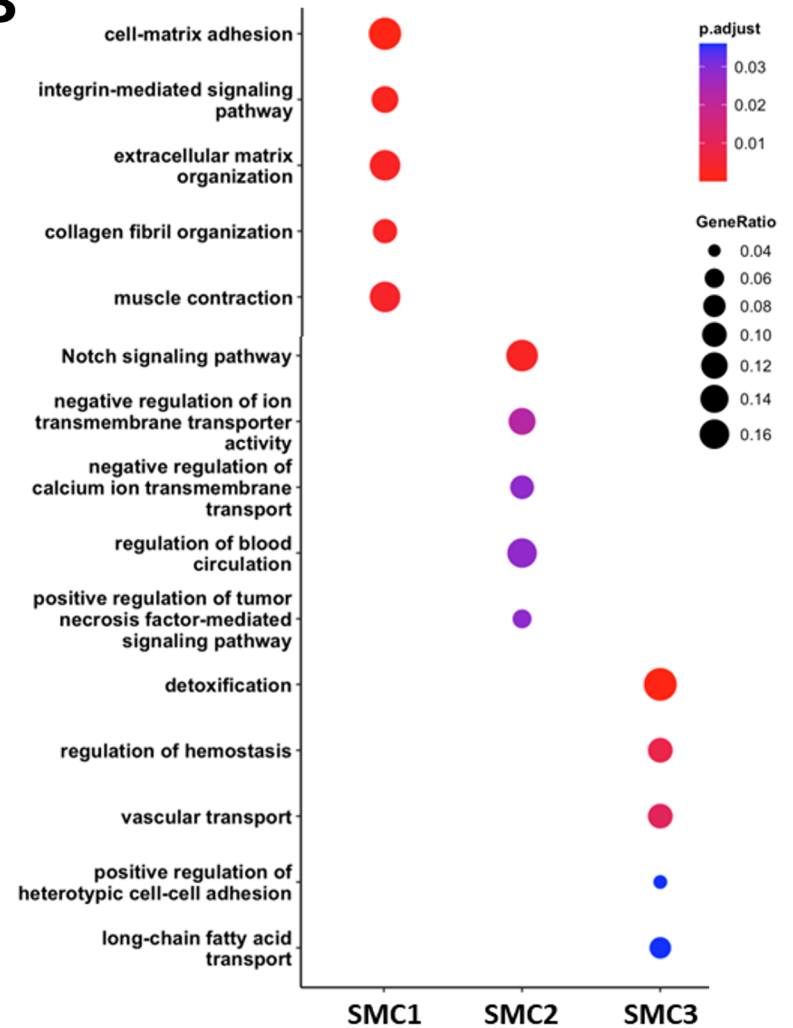

**S5 Fig. Predicted functional differences among cell populations in veins.** Gene ontology pathway analysis of genes expressed in endothelial cell (A) and smooth muscle cell (B) populations in veins. EC1: arteriolar-like, EC2: capillary-like, EC3: venous-like, EC4: valvular-like, EC5: lymphatic-like, SMC1: *MYH11*<sup>hi</sup>*DES*<sup>hi</sup>, SMC2: *MYH11*<sup>lo</sup>*DES*<sup>lo</sup>, SMC3: pericyte-like.
