# Supplementary material for: The intricate cellular ecosystem of human peripheral veins as revealed by single-cell transcriptomic analysis
Source: PubMed Central journal article supplement (PMC10783777; doi:10.1371/journal.pone.0296264), 2024-01-11

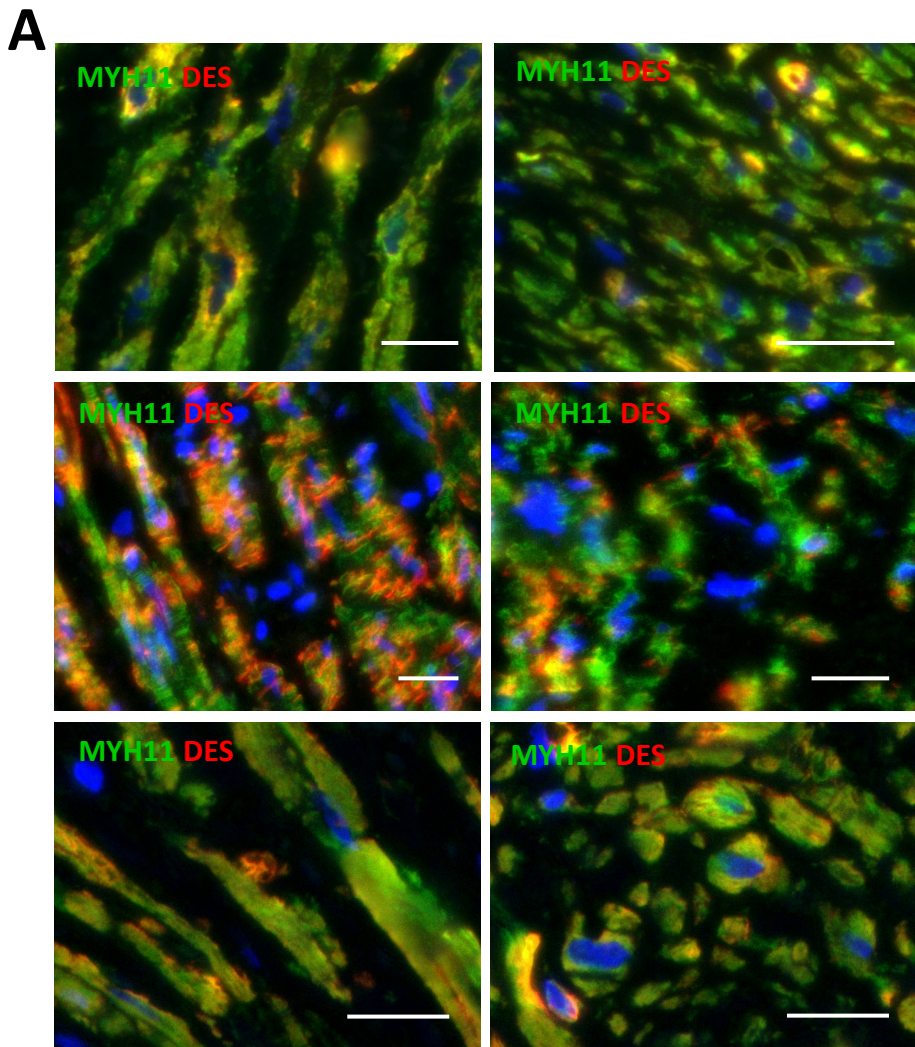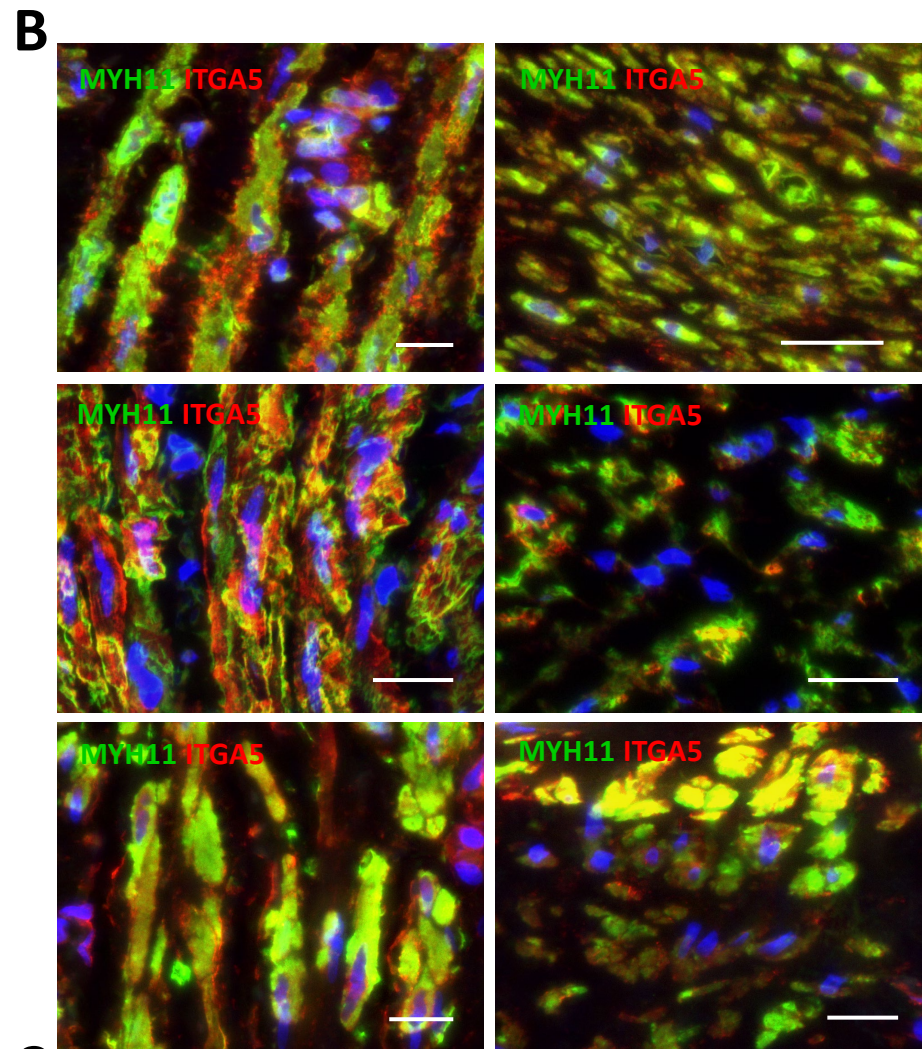

**S7 Fig. Types of smooth muscle cells in veins.** **A)** Representative co-immunofluorescence of MYH11 and desmin in medial (left) and intimal SMCs (right). Cells with high (yellow-orange) and low desmin expression (green) coexist in both layers. **B)** Co-immunofluorescence of MYH11 and ITGA5 in medial (left) and intimal SMCs (right) shows similar distribution of ITGA5 high and low cells as in **A**. **C)** STEAP4<sup>+</sup> pericytes surrounding microvessels. Scale bar = 20  $\mu$ m in all panels.

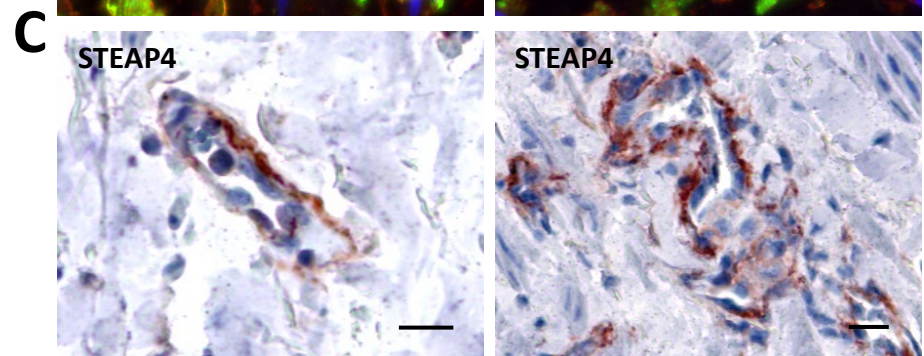

Supplement: pone.0296264.s008.pdf [file pone.0296264.s008.pdf]
