# Supplementary material for: The intricate cellular ecosystem of human peripheral veins as revealed by single-cell transcriptomic analysis
Source: PubMed Central journal article supplement (PMC10783777; doi:10.1371/journal.pone.0296264), 2024-01-11
Supplement: pone.0296264.s009.pdf [file pone.0296264.s009.pdf]

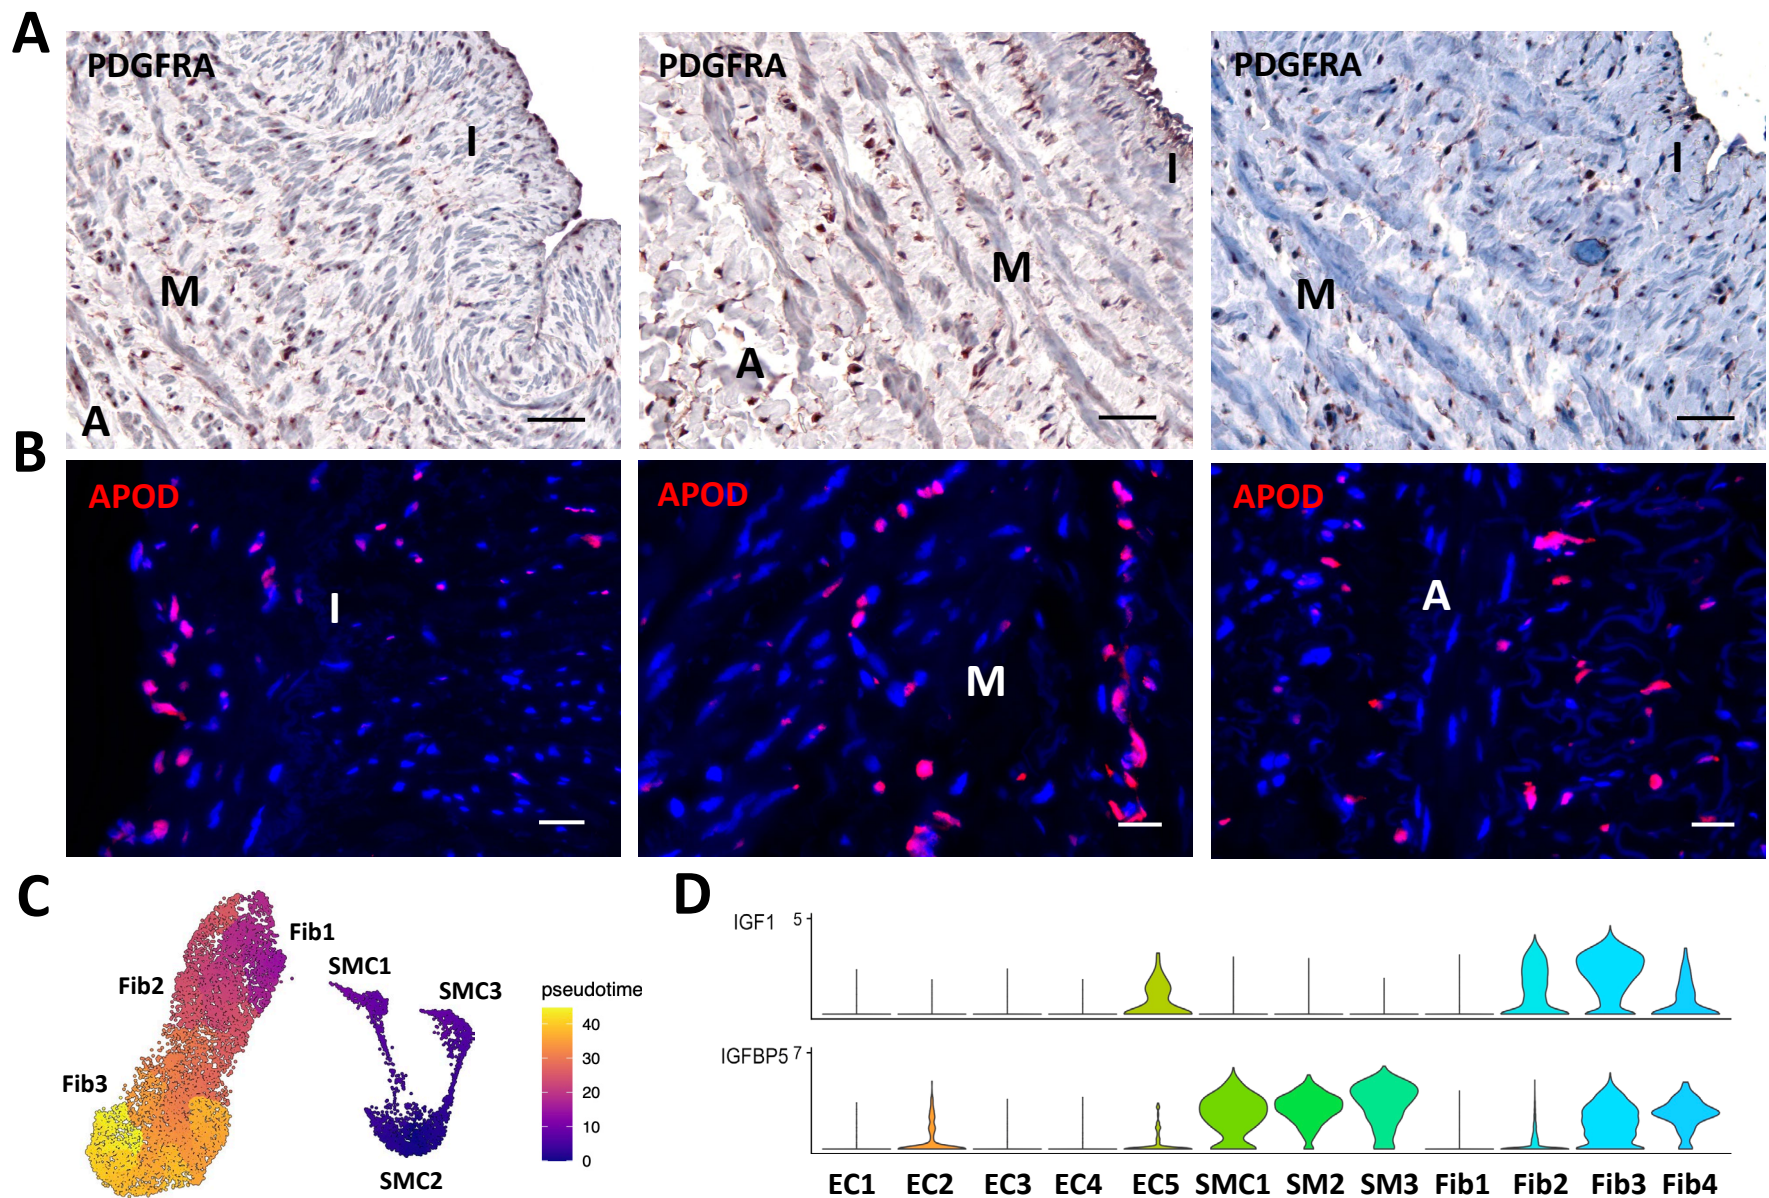

**S8 Fig. Venous fibroblasts.** **A)** Representative IHC of PDGFRA<sup>+</sup> fibroblasts in veins demonstrates widespread distribution in the wall. Scale bars = 50  $\mu$ m. **B)** Immunofluorescence of APOD in the intima (I), media (M), and adventitia (A). APOD<sup>+</sup> fibroblasts appear in pink while extracellular APOD is shown in red. Scale bars = 20  $\mu$ m. **C)** The Fib1 cluster is most closely related to SMC1 cells as predicted by pseudotime trajectory analysis. **D)** *IGFBP5* in SMCs can potentiate the effects of insulin-like growth factor 1 (*IGF1*) from fibroblasts to promote SMC proliferation.
