# Supplementary material for: The intricate cellular ecosystem of human peripheral veins as revealed by single-cell transcriptomic analysis
Source: PubMed Central journal article supplement (PMC10783777; doi:10.1371/journal.pone.0296264), 2024-01-11

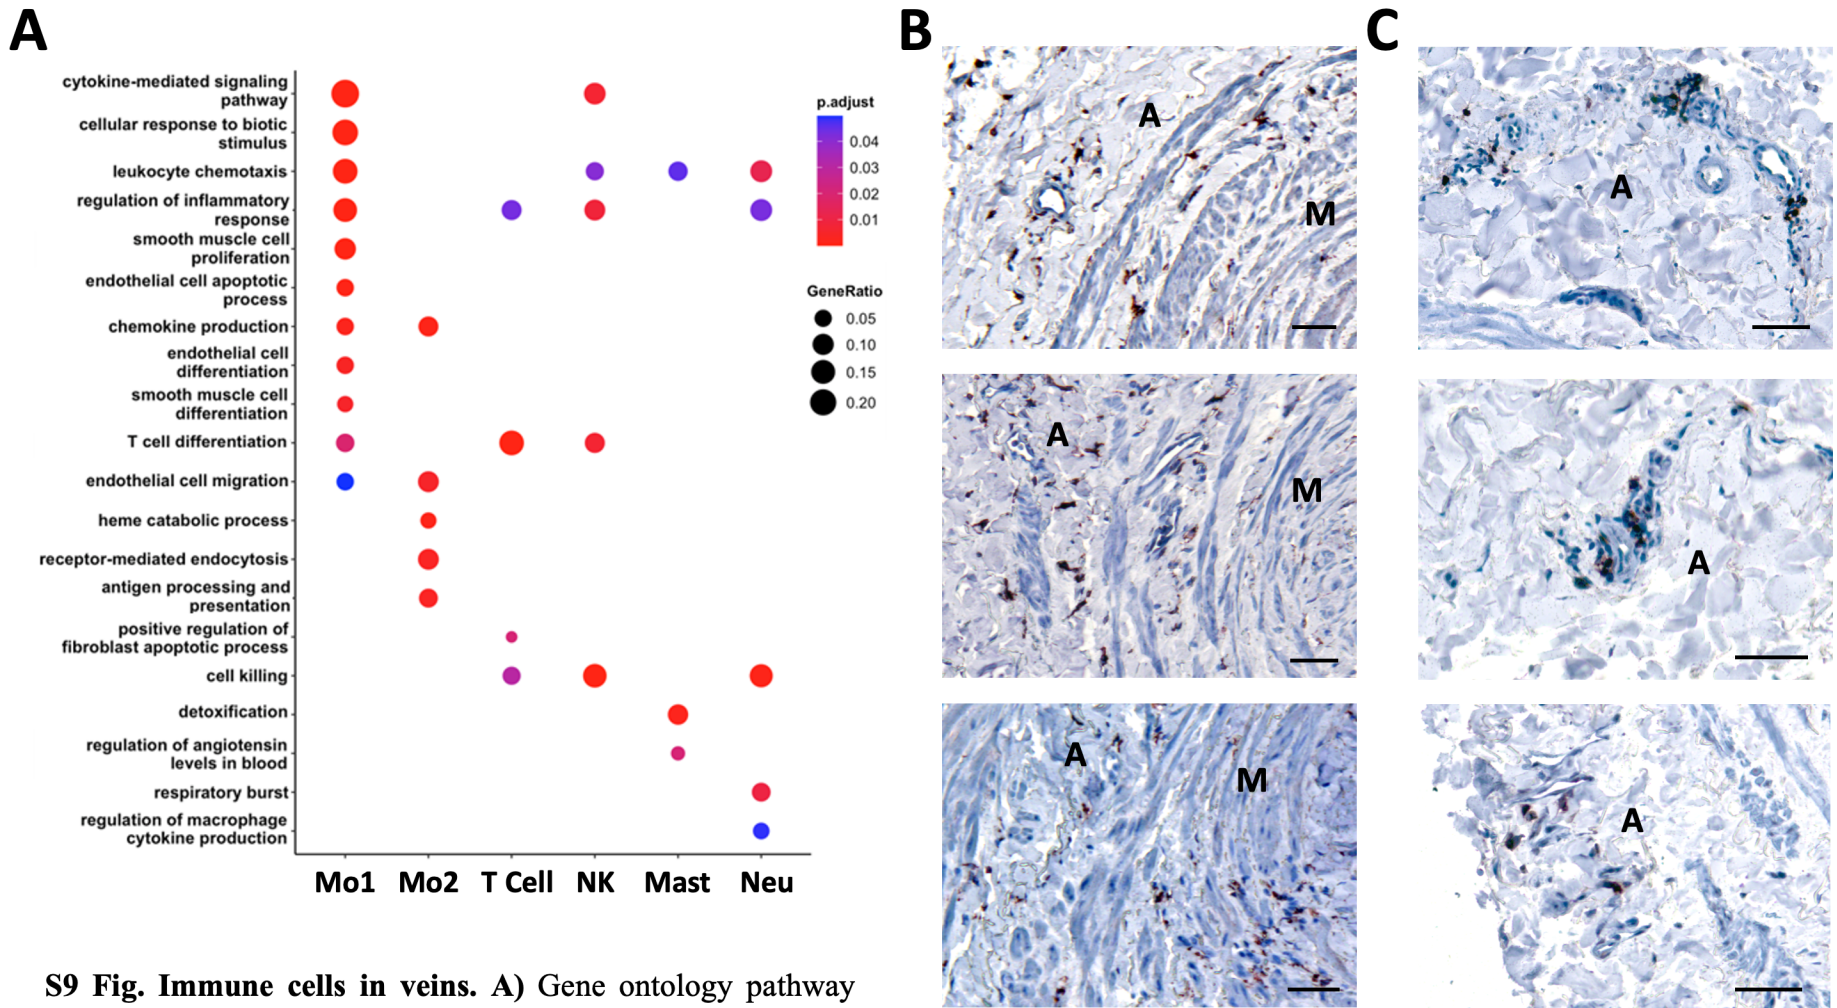

**S9 Fig. Immune cells in veins.** A) Gene ontology pathway analysis of genes expressed in immune cell populations in veins. Mo: monocyte/macrophages, NK: natural killer cells, Mast: mast cells, Neu: neutrophils. B-C) Representative stainings of CD163<sup>+</sup> monocyte/macrophages (B) and CD8<sup>+</sup> T cells (C) in basilic veins from the validation cohort. Scale bars represent 50  $\mu$ m in all panels. A: adventitia, M: media. D) Donor's age is positively correlated with CD163<sup>+</sup> cell counts, but not CD8<sup>+</sup> counts, in 6-7 basilic veins analyzed by IHC.

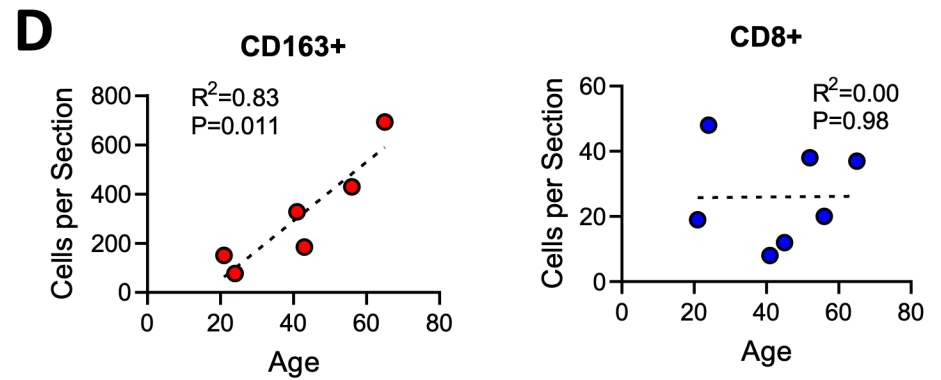

Supplement: pone.0296264.s010.pdf [file pone.0296264.s010.pdf]
